# Supplementary material
Source: PubMed Central journal article supplement (PMC4187678)
Supplement: JB.01851-14_zjb999093307so1.pdf [file JB.01851-14_zjb999093307so1.pdf]

## Supplementary material

### **CysK2 is an O-Phospho-L-Serine Dependent S-Sulfocysteine Synthase in *Mycobacterium tuberculosis***

Eva Maria Steiner<sup>a</sup>, Dominic Böth<sup>a</sup>, Philip Lössl<sup>a</sup>, Francisco Vilaplana<sup>b</sup>, Robert Schnell<sup>a</sup> and Gunter Schneider<sup>#a</sup>

*a. Department of Medical Biochemistry and Biophysics, Karolinska Institutet, Stockholm, Sweden*

*b. Division of Glycoscience, School of Biotechnology, Royal Institute of Technology, Stockholm, Sweden*

#### Supplementary Figure S1:

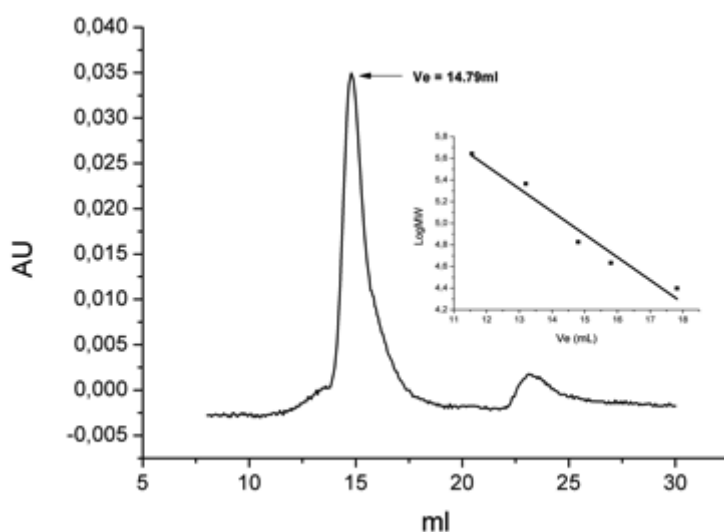

#### Supplementary Figure S1. The oligomerization state of CysK2 in solution.

Analytical size exclusion chromatography was used to estimate the molecular weight of CysK2 in solution. The superdex-200 10/300 column (GE-Healthcare) was equilibrated with the buffer 25 mM Tris-HCl pH 8.0, 150 mM NaCl and 200  $\mu$ g CysK2 was loaded and eluted at 14.8 ml volume. Using the calibration curve based on chymotrypsinogen-A (25 kDa), ovalbumin (43 kDa), albumin (67 kDa), catalase (232 kDa) and ferritin (440 kDa) the estimated molecular weight is 86.8 kDa. Considering the sequence-derived mass of a monomer (40.1 kDa), CysK2 is most likely a dimer in solution.

### Supplementary Figure S2:

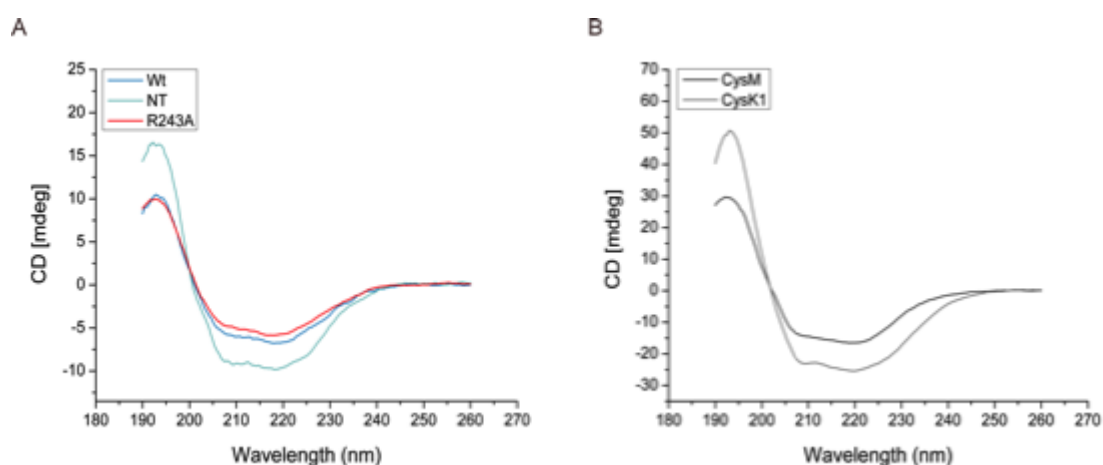

**Supplementary Figure S2. Folding integrity of CysK2 investigated by circular dichroism (CD).** (A) CD spectra of CysK2, CysK2<sub>NT</sub> (residues Thr20-Ser353) and the CysK2<sub>R243A</sub> mutant. (B) For comparison the CD spectra of CysK1<sub>Mtb</sub> and CysM<sub>Mtb</sub> are shown.

### Supplementary Figure S3:

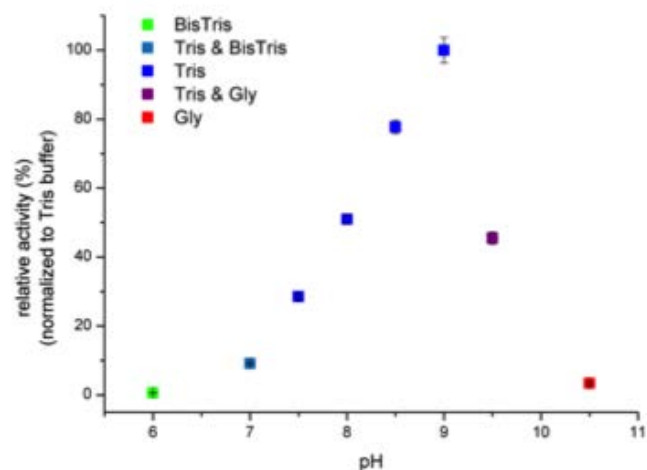

**Supplementary Figure S3. The effect of pH on the rate of phosphate release in first half reaction of CysK2.** The pH dependence of the CysK2 catalyzed reaction with OPS using the phosphate-release based assay in the absence of the second substrate reflects the pH-sensitivity of the aminoacrylate intermediate. The buffers used are indicated.

### Supplementary Figure S4:

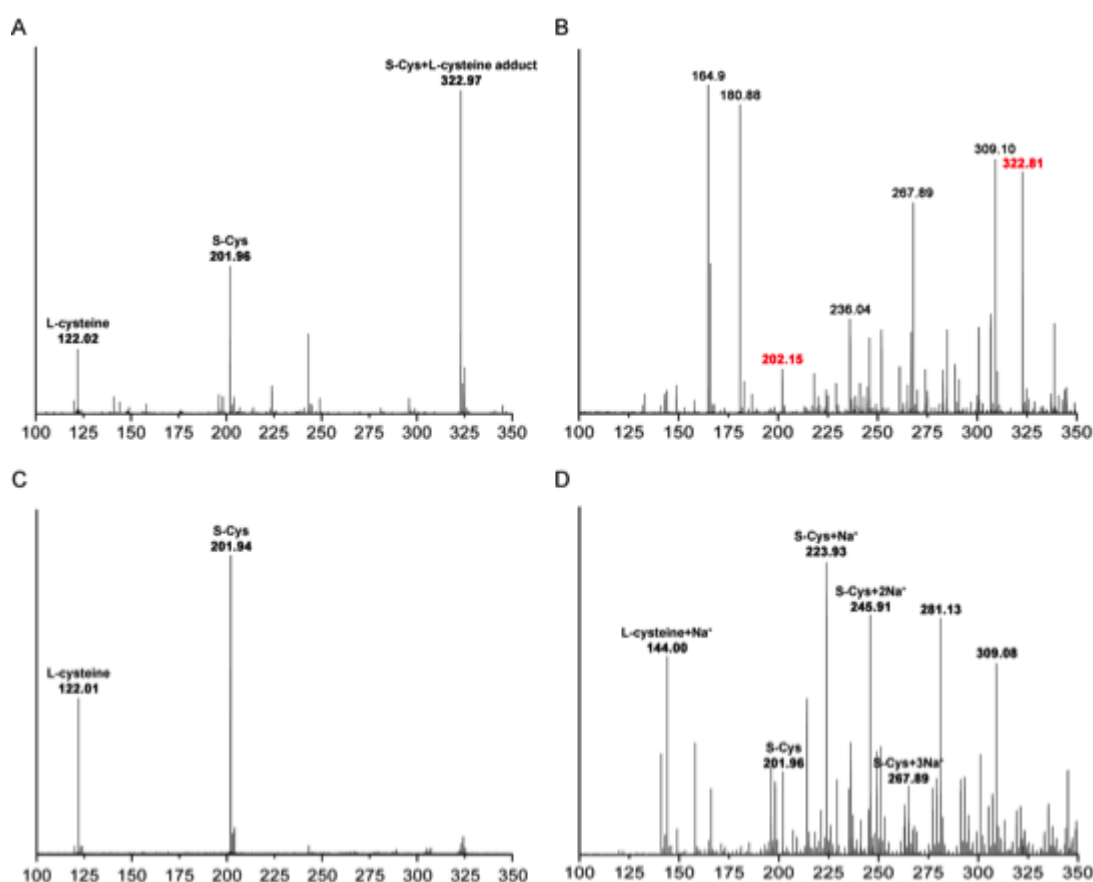

**Supplementary Figure S4.** ESI-MS and ESI-MS/MS spectra of S-sulfocysteine and the reaction product of the CysK2 reaction with OPS and thiosulfate as substrate. (A) ESI-MS spectra of a commercial sample of S-sulfocysteine with corresponding m/z peaks of 122.02, 201.96 and 322.97, which refer to L-cysteine, S-sulfocysteine (S-Cys) and the S-sulfocysteine-L-cysteine adduct, respectively. (B) Mass spectrum of the reaction product formed by CysK2 using OPS and thiosulfate as substrates. A m/z of 202.15 for S-sulfocysteine and a m/z of 322.81 for the S-Cys+L-cysteine adduct was identified (red). (C) Confirmation of the S-Cys+L-cysteine adduct by fragmentation of the 322 m/z peak, which resulted in peaks for L-cysteine (122.01) and S-sulfocysteine (201.94). (D) Mass-spectrum of S-sulfocysteine in 10 mM Na<sub>2</sub>HPO<sub>4</sub> buffer pH 7.0, resulting in ionised molecule fractions due to the presence of sodium cations.

**Table S1.** Primers for PCR amplification of the CysK2 variants carrying the R243A mutation and the N-terminal truncation.

| <b>Oligo name</b> | <b>Sequence (5' -&gt; 3')</b>                         | <b>Comment</b>                                              |
|-------------------|-------------------------------------------------------|-------------------------------------------------------------|
| ESOLI_001         | CGCGTCGAACAGGCTGATG <u>GGCC</u> GGGCTGGGCTCGAGTATTTAT | R243A mutagenesis, forward                                  |
| ESOLI_002         | ATAAATACTCGAGCCCAGCCC <u>GGC</u> CATCAGCCTGTTTCGACGCG | R243A mutagenesis, reverse                                  |
| ESOLI_005         | CATG <u>CATATG</u> ACTCCTGGCCGGAATCGCC                | Amplification primer for CysK2-NT, forward, NdeI site       |
| SROLI-193         | TGCTAGTTATTGCTCAGCGGTGGC                              | Amplification primer for CysK2-NT, reverse, pET28a specific |
